# Supplementary material for: OXM-104, a potential candidate for the treatment of obesity, NASH and type 2 diabetes
Source: Research Square preprint supplement (doi:10.21203/rs.3.rs-223237/v1), 2021-04-01
Supplement: Supplementary file 1 [file 2aebc1d73333afbbb40fe941.pdf]

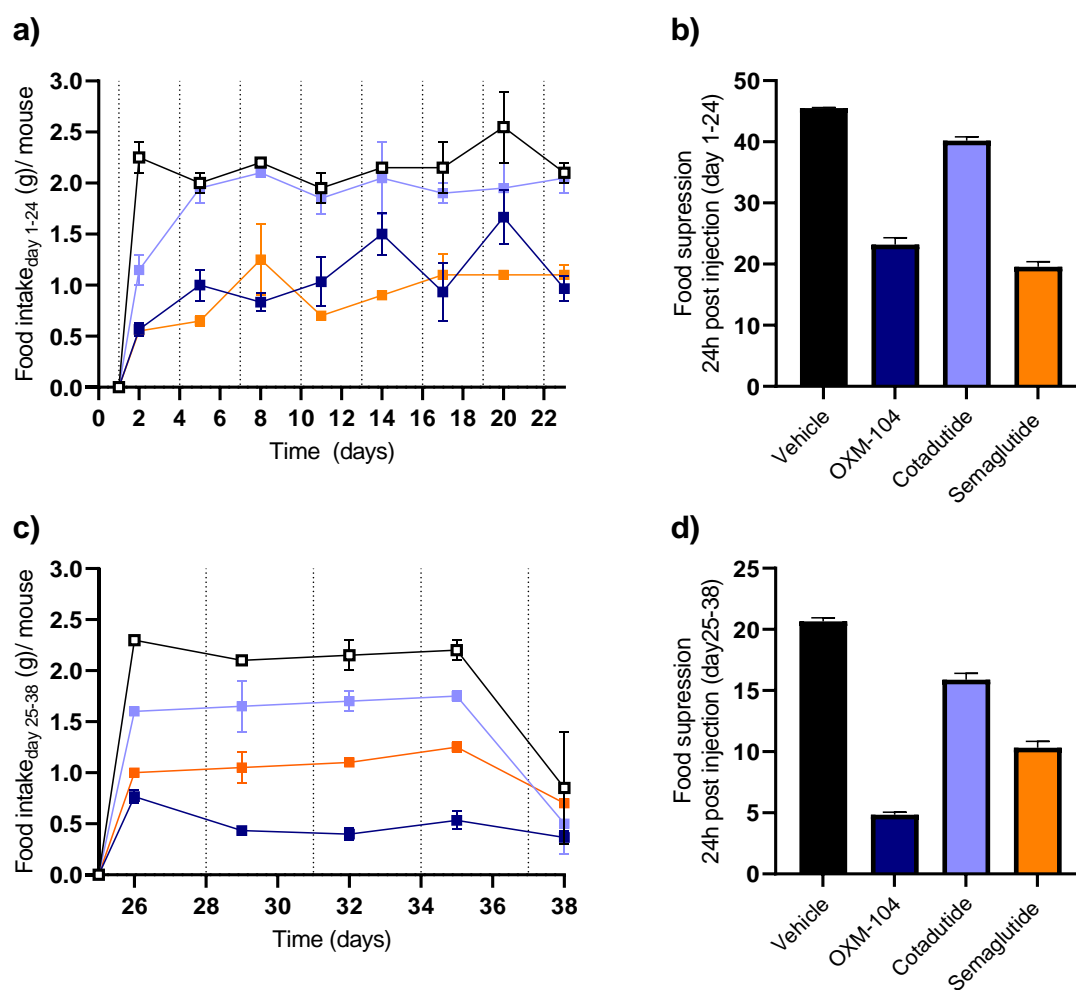

1

2 **Figure S1 Effects of OXM-104, cotadutide and semaglutide on food suppression.** Mice receiving OXM-104 (n=10),  
3 cotadutide (n=10) and semaglutide (n=10) for 38 days. In the first 24 days, OXM-104 and semaglutide were dosed at 30  
4 nmol/kg, whereas cotadutide was dosed at 10 nmol/kg. From day 25 doses were increased 3-fold, corresponding to 90  
5 nmol/kg for OXM-104 and semaglutide and 30 nmol/kg for cotadutide. Food intake (g)/mouse before and after dose  
6 increase shown in (a and c). AUC graphs representing food intake 24 hours after dosing with OXM-104 and benchmark  
7 peptides; day 1-24 (b) and day 25-38 (d). Data are presented as mean  $\pm$  SEM.

# Acute test of OXM-104 and semaglutide in MSNASH/PcoJ mice

24 male MS NASH mice (6-7 weeks of age upon arrival) were introduced to GAN-diet for 24 days prior to study start. Animals were randomly allocated into treatment groups according to body weight (n=8 animals/group). To explore the acute effects on body weight and caloric intake, mice received a single subcutaneous administration with either vehicle, OXM-104 (30 nmol/kg) or semaglutide (30 nmol/kg). Animals were fasted for 5-hours before administration, and body weight and caloric intake were monitored daily over a 72h period with ad libitum access to food and water.

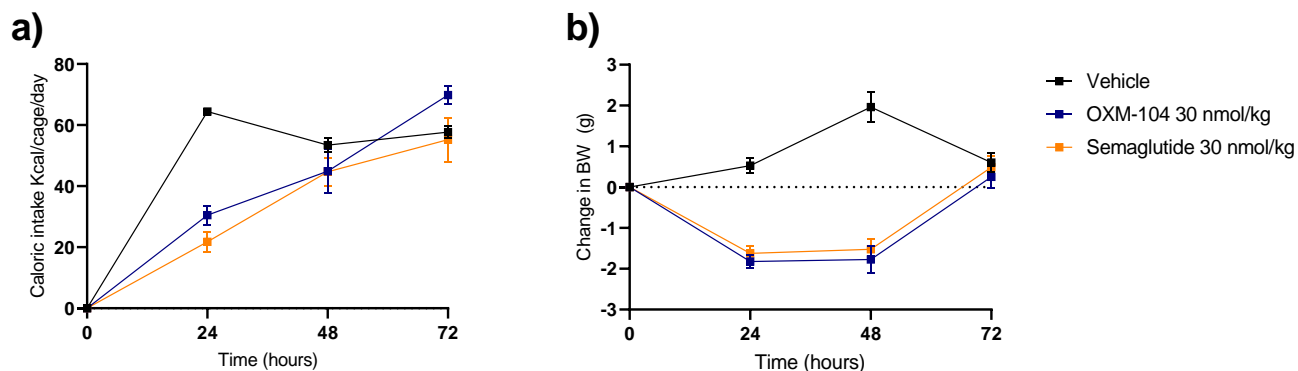

**Figure S2. Acute effect of OXM-104 and Semaglutide on caloric intake and body weight after a single injection.** Following a 5h fast, male MSNASH mice were administered vehicle (n=8), OXM-104 (n=8) or semaglutide (n=8) at 30nmol/kg. Caloric intake (a) and body weight change (b) were monitored once-daily for 72 hours.

| Absolute AT weights                | C57BL6 mice         |      |                      |      |                  |      |
|------------------------------------|---------------------|------|----------------------|------|------------------|------|
|                                    | Inguinal (g±SEM)    |      | Perirenal (g±SEM)    |      | Liver (g±SEM)    |      |
| Vehicle                            | 1.3                 | 0.09 | 0.8                  | 0.05 | 1.2              | 0.07 |
| PF-OXM-104                         | 0.8** <sup>#</sup>  | 0.1  | 0.3*** <sup>#</sup>  | 0.04 | 1.0*             | 0.09 |
| OXM-104                            | 0.4***              | 0.04 | 0.1***               | 0.02 | 1.1              | 0.05 |
| Cotadutide                         | 0.7***              | 0.1  | 0.4***               | 0.07 | 0.9              | 0.06 |
| Semaglutide                        | 0.8***              | 0.11 | 0.4***               | 0.07 | 0.9**            | 0.04 |
| Chow control                       | 0.1**               | 0.01 | 0.05***              | 0.01 | 0.9*             | 0.05 |
| AT weights relative to body weight | Inguinal (g/kg±SEM) |      | Perirenal (g/kg±SEM) |      | Liver (g/kg±SEM) |      |
| Vehicle                            | 29.6                | 1.8  | 17.7                 | 1.0  | 26.6             | 1.1  |
| PF-OXM-104                         | 21.3 <sup>#</sup>   | 1.4  | 7.7***               | 0.9  | 24.3###          | 3.1  |
| OXM-104                            | 12.0****            | 1.0  | 4.0***               | 0.4  | 37.3***          | 1.5  |
| Cotadutide                         | 19.6**              | 2.3  | 9.5***               | 1.5  | 29.8             | 2.4  |
| Semaglutide                        | 20.5**              | 2.1  | 11.4**               | 1.8  | 25.7             | 0.9  |
| Chow control                       | 2.4***              | 0.4  | 2.0***               | 0.5  | 39.9***          | 1.5  |

**Table S1 Adipose tissue depots and liver weights in female obese (C57BL6) mice following 38 days treatment with OXM-104, cotadutide, semaglutide, PF-OXM-104, and age-matched lean controls.** Weights of inguinal and perirenal adipose tissue (AT) depots and liver presented in absolute term (g) and relative to body weights (g/kg). (n=10) for all groups except for PF-OXM-104 and chow control; (n=5). Statistical analysis between groups was evaluated by an ordinary one-way ANOVAs with Tukey’s multiple comparisons test. \*\*\* p<0.001 compared to vehicle mice. # p<0.05 ### p<0.001 when compared to OXM-104. Data are presented as mean ± SEM.

| Absolute AT weights                | MSNASH mice           |      |                       |      |                        |      |                            |      |
|------------------------------------|-----------------------|------|-----------------------|------|------------------------|------|----------------------------|------|
|                                    | Inguinal (g±SEM)      |      | Epididymal (g±SEM)    |      | Perirenal (g±SEM)      |      | Liver (g±SEM)              |      |
| Vehicle                            | 0.6                   | 0.05 | 0.8                   | 0.02 | 0.8                    | 0.04 | 4.8                        | 0.2  |
| PF-OXM-104                         | 0.4 #                 | 0.04 | 0.8##                 | 0.1  | 0.9###                 | 0.1  | 3.2***                     | 0.2  |
| OXM-104                            | 0.2***                | 0.03 | 0.4**                 | 0.04 | 0.3***                 | 0.1  | 1.9***                     | 0.1  |
| Cotadutide                         | 0.5                   | 0.1  | 0.7                   | 0.1  | 0.6                    | 0.1  | 2.5***                     | 0.1  |
| Semaglutide                        | 0.5                   | 0.03 | 0.9                   | 0.04 | 0.8                    | 0.04 | 3.4***                     | 0.6  |
| Chow control                       | 0.2 **                | 0.1  | 1.1                   | 0.3  | 0.4                    | 0.1  | 4.0***                     | 0.2  |
| AT weights relative to body weight | Inguinal (g/kg±SEM)   |      | Epididymal (g/kg±SEM) |      | Perirenal (g/kg±SEM)   |      | Liver (g/kg±SEM)           |      |
| Vehicle                            | 13.3                  | 0.4  | 15.9                  | 0.6  | 15.1                   | 0.6  | 94.0                       | 2.7  |
| PF-OXM-104                         | 9.4                   | 1.0  | 17.9###               | 1.5  | 18.8###                | 1.2  | 68.5***                    | 2.9  |
| OXM-104                            | 6.8*                  | 0.6  | 11.2***               | 0.9  | 8.9**                  | 1.3  | 59.9***                    | 2.4  |
| Cotadutide                         | 10.8                  | 1.0  | 16.6                  | 0.7  | 14.0                   | 1.5  | 59.3***                    | 1.5  |
| Semaglutide                        | 11.7                  | 0.7  | 19.3*                 | 0.7  | 16.6                   | 0.7  | 36.8***                    | 9.5  |
| Chow control                       | 10.4                  | 2.4  | 48.1***               | 10.8 | 18.0                   | 4.2  | 82.1***                    | 18.6 |
| FBG                                | Baseline (mmol/L±SEM) |      |                       |      | Study end (mmol/L±SEM) |      | Change in FBG (mmol/L±SEM) |      |
| Vehicle                            | 14.2                  | 0.7  |                       |      | 12.1                   | 0.5  | -2.9                       | 1.0  |
| PF-OXM-104                         | 12.6                  | 1.3  |                       |      | 10.6##                 | 0.3  | -2.0                       | 1.1  |
| OXM-104                            | 11.9                  | 0.6  |                       |      | 4.9***                 | 0.2  | -6.9                       | 0.8  |
| Cotadutide                         | 12.4                  | 0.6  |                       |      | 10.0                   | 0.4  | -2.4                       | 0.7  |
| Semaglutide                        | 11.9                  | 0.8  |                       |      | 12.2                   | 0.3  | 0.3                        | 0.9  |
| Chow control                       | 9.2                   | 0.6  |                       |      | 9.7                    | 0.4  | 0.5                        | 0.4  |
| Study end plasma insulin           | Study End (ng/mL±SEM) |      |                       |      |                        |      |                            |      |
| Vehicle                            | 14.1                  | 1.6  |                       |      |                        |      |                            |      |
| PF-OXM-104                         | 4.6***                | 0.6  |                       |      |                        |      |                            |      |
| OXM-104                            | 2.9***                | 0.7  |                       |      |                        |      |                            |      |
| Cotadutide                         | 5.4***                | 0.8  |                       |      |                        |      |                            |      |
| Semaglutide                        | 7.4**                 | 0.9  |                       |      |                        |      |                            |      |
| Chow control                       | 3.7***                | 0.7  |                       |      |                        |      |                            |      |

Table S 2 Adipose tissue depots weights, liver weights, FBG levels, and plasma insulin in male obese NASH mice following 50 days treatment with OXM-104, cotadutide, semaglutide, PF-OXM-104, and age-matched chow control. Weights of inguinal, epididymal, and perirenal adipose tissue depots and liver presented in absolute terms (g) and relative to body weights (g/kg). Statistical analysis between groups was evaluated by an ordinary one-way ANOVA with Tukey's multiple comparisons test (inguinal, Epididymal AT relative to body weight, perirenal relative to body weight and liver weights; absolute and relative to body weight and changes in ALP levels) or a Kruskal-Wallis test with Dunn's multiple comparison test (Inguinal AT relative to body weight, epididymal AT, perirenal AT and plasma insulin). (n=19; OXM-104), (n=15; cotadutide), (n=16; semaglutide), (n=8; PF-OXM-104), (n=15; vehicle) and (n=4; chow control). \* p<0.05 \*\* p<0.01 \*\*\* p<0.001 compared to vehicle. # p<0.05 ### p<0.001 when compared to PF-OXM-104. Data are presented as mean ± SEM.

| Absolute AT weights                | db/db mice             |     |                          |      |                         |      |                     |       |
|------------------------------------|------------------------|-----|--------------------------|------|-------------------------|------|---------------------|-------|
|                                    | Inguinal<br>(g±SEM)    |     | Epididymal<br>(g±SEM)    |      | Perirenal<br>(g±SEM)    |      | Liver<br>(g±SEM)    |       |
| <b>Vehicle</b>                     | 1.3                    | 0.1 | 0.7                      | 0.03 | 0.8                     | 0.03 | 3.2                 | 0.1   |
| <b>OXM-104</b>                     | 1.3                    | 0.1 | 0.6                      | 0.05 | 0.4***                  | 0.1  | 1.8***              | 0.2   |
| <b>Cotadutide</b>                  | 1.3                    | 0.3 | 0.9                      | 0.2  | 0.5                     | 0.1  | 3.7                 | 0.7   |
| <b>Semaglutide</b>                 | 1.4                    | 0.1 | 0.7                      | 0.03 | 0.7                     | 0.03 | 2.5                 | 0.1   |
| AT weights relative to body weight | Inguinal<br>(g/kg±SEM) |     | Epididymal<br>(g/kg±SEM) |      | Perirenal<br>(g/kg±SEM) |      | Liver<br>(g/kg±SEM) |       |
| <b>Vehicle</b>                     | 24.2                   | 1.2 | 12.4                     | 0.5  | 14.4                    | 0.9  | 59.4                | 4.4   |
| <b>OXM-104</b>                     | 30.4*                  | 1.8 | 15.6*                    | 0.9  | 10.3**                  | 1.2  | 42.8*               | 5.5** |
| <b>Cotadutide</b>                  | 28.9                   | 5.9 | 20.2***                  | 4.1  | 12.5                    | 2.7  | 82.6                | 16.5  |
| <b>Semaglutide</b>                 | 28.3                   | 2.2 | 14.5                     | 0.6  | 14.3                    | 0.7  | 49.8                | 2.0   |

**Table S 3 Adipose tissue depots and liver weights in male db/db mice following 50 days of treatment with OXM-104, cotadutide and semaglutide.** Weights of inguinal, epididymal, and perirenal adipose tissue depots and liver presented in absolute term (g) and relative to body weights (g/kg). (n=13; OXM-104), (n=7; cotadutide), (n=14; semaglutide) and (n=16; vehicle). Statistical analysis between groups was evaluated by an ordinary one-way ANOVAs with Tukey's multiple comparisons test \* p<0.05 \*\* p<0.01 \*\*\* p<0.001 compared to vehicle. Data are presented as mean ± SEM.
